1 **Intersubject consistent dynamic connectivity during natural vision revealed by functional MRI**

2

3 Xin Di <sup>1,2</sup>, Bharat B Biswal <sup>1,2\*</sup>

4

5 1. Department of Biomedical Engineering, New Jersey Institute of Technology, Newark, NJ, 07029, USA

6 2. School of Life Sciences and Technology, University of Electronic Science and Technology of China,

7 Chengdu, China

8

9 \* Corresponding author:

10 Bharat B. Biswal, PhD

11 607 Fenster Hall, University Height

12 Newark, NJ, 07102, USA

13 bbiswal@yahoo.com

14

15 **Abstract**

16 The functional communications between brain regions are thought to be dynamic. However, it is usually  
17 difficult to elucidate whether the observed dynamic connectivity is functionally meaningful or simply due  
18 to noise during unconstrained task conditions such as resting-state. During naturalistic conditions, such  
19 as watching a movie, it has been shown that local brain activities, e.g. in the visual cortex, are consistent  
20 across subjects. Following similar logic, we propose to study intersubject correlations of the time courses  
21 of dynamic connectivity during naturalistic conditions to extract functionally meaningful dynamic  
22 connectivity patterns. We analyzed a functional MRI (fMRI) dataset when the subjects watched a short  
23 animated movie. We calculated dynamic connectivity by using sliding window technique, and quantified  
24 the intersubject correlations of the time courses of dynamic connectivity. Although the time courses of  
25 dynamic connectivity are thought to be noisier than the original signals, we found similar level of  
26 intersubject correlations of dynamic connectivity to those of regional activity. Most importantly, highly  
27 consistent dynamic connectivity could occur between regions that did not show high intersubject  
28 correlations of regional activity, and between regions with little stable functional connectivity. The  
29 analysis highlighted higher order brain regions such as the default mode network that dynamically  
30 interacted with posterior visual regions during the movie watching, which may be associated with the  
31 understanding of the movie.

32

33 **Keywords:** default mode network; dynamic connectivity; intersubject correlation; movie connectome;  
34 naturalistic condition; supramarginal gyrus

35

36 **Highlights**

37 • Intersubject consistency may provide a complementary approach to study brain dynamic

38 connectivity

39 • Widespread brain regions showed highly consistent dynamic connectivity during movie watching,

40 while these regions themselves did not show highly consistent regional activity

41 • Consistent dynamic connectivity often occurred between regions from different functional

42 systems

43

## 44 **1. Introduction**

45 The functional communications between spatially remote brain regions, especially the dynamics of  
46 connectivity, is a key to understand brain functions (Bullmore and Sporns, 2012; Friston, 2011; Park and  
47 Friston, 2013). Recently, the dynamics of connectivity has drawn increasing interests of research,  
48 especially in resting-state (Allen et al., 2014; Fu et al., 2019, 2018; Hutchison et al., 2013). However, due  
49 to the unconstrained nature of resting-state, it is difficult to elucidate whether the observed changes of  
50 connectivity across sliding windows are due to real fluctuations of functional communications, or simply  
51 due to random fluctuations (Lindquist et al., 2014). Moreover, the blood-oxygen-level dependent (BOLD)  
52 signals measured by fMRI are sensitive to physiological noises, such as respiration, heartbeat (Teichert et  
53 al., 2010), and head motion (Power et al., 2012), which may give rise to spurious correlation estimates for  
54 short window.

55 One way to capture meaningful dynamic functional connectivity is to manipulate subjects' mental  
56 states during the course of scan, so that there is known reference for the changes of connectivity. For  
57 example, in a typical task-based fMRI study with blocked design, different task conditions are assigned as  
58 blocks. Therefore, the time courses of dynamic connectivity can be correlated with the task design to  
59 identify task related connectivity changes (Di et al., 2015; Rosenthal et al., 2017). An alternative  
60 approach is to expose the subjects with naturalistic stimuli, such as a short movie. Although there is no  
61 predefined references of dynamic connectivity changes, one may take advantage of the phenomenon of  
62 intersubject correlation to capture changes that are consistent across different subjects (Hasson et al., 2004;  
63 Nastase et al., 2019).

64 In the seminal study, Hasson and colleagues calculated intersubject correlations of the time series  
65 of BOLD signal (Figure 1A) when the subjects were watching a movie (Hasson et al., 2004). They  
66 demonstrated that several brain regions, especially the visual cortex, are highly correlated across subjects  
67 during the movie watching. We propose that similar approach can be applied to the time courses of  
68 dynamic connectivity to capture meaningful functional communication dynamics during natural vision.  
69 Specifically, dynamic connectivity is usually calculated using a sliding window approach, so that a time

70 series of dynamic connectivity can be obtained. The time courses of dynamic connectivity can then be  
71 correlated across-subjects (Figure 1B). If the dynamic connectivity reflects real time functional  
72 communications between regions that are caused by the viewing of natural stimuli, then the time courses  
73 of dynamic connectivity from different subjects should somehow correlated. Therefore, we can apply  
74 intersubject correlation method to identify meaningful dynamic communications between regions.

**A. Intersubject correlation of regional activity**

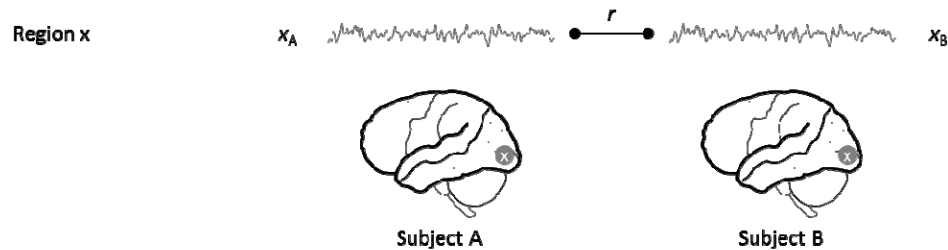

**B. Intersubject correlation of dynamic connectivity**

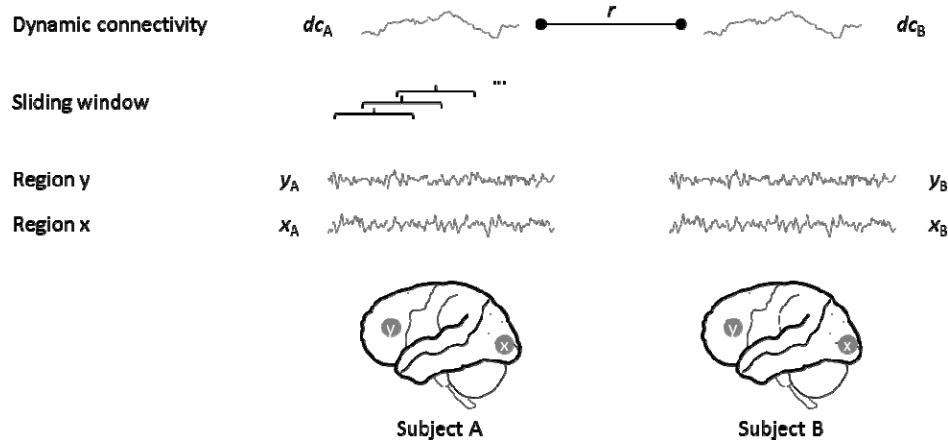

75  
76 **Figure 1** Illustration of the calculations of intersubject correlations of the time series of regional activity  
77 (A) and the time courses of dynamic connectivity between two regions (B).

78  
79 In the current study, we analyzed an fMRI dataset where the subjects were scanned when viewing  
80 a short animated movie. The aim was to identify dynamic connectivity that were shared cross subjects  
81 during the movie watching. In order to do so, we first performed regular intersubject correlation analysis  
82 to identify brain regions that showed consistent regional activity. Given these regions, we adopted a seed-

83 based strategy to calculate dynamic connectivity between a seed region and every voxels in the brain. We  
84 then evaluated and identified regions whose connectivity with the seed were consistent cross subjects.  
85 Even though higher order association regions did not typically show high intersubject correlations of  
86 regional activity (Hasson et al., 2004), their functional communications with lower order regions may be  
87 consistent across subject following the narrative of the movie. We therefore hypothesized that  
88 intersubject correlations of dynamic connectivity may be able to identify more widespread regions and  
89 functional dynamics that are associated with the watching of the movie.

90

## 91 **2. Materials and methods**

### 92 **2.1. Data and task**

93 The fMRI data were obtained through openneuro (<https://openneuro.org/>; accession #: ds000228). Only  
94 the data from adult subjects were analyzed. There were originally 33 adult subjects. Two subjects' data  
95 were discarded because of poor brain coverage (subject #: sub-pixar123 and sub-pixar124), and two were  
96 discarded due to large head motions (sub-pixar149 and sub-pixar150). As a result, a total of 29 subjects  
97 were included in the current analysis (17 females). The mean age is 24.6 years old (18 to 39 years).

98 During the fMRI scan, the subjects watched a silent version of Pixar animated movie “Partly  
99 Cloudy”, which is 5.6 minutes long (<https://www.pixar.com/partly-cloudy#partly-cloudy-1>). Brain MRI  
100 images were acquired on a 3-Tesla Siemens Tim Trio scanner using the standard Siemens 32-channel  
101 head coil. Functional images were collected with a gradient-echo EPI sequence sensitive to BOLD  
102 contrast in 32 interleaved near-axial slices (EPI factor: 64; TR: 2 s, TE: 30 ms, flip angle: 90°). The  
103 voxel size were 3.13 mm isotropic, with 3 subjects with no slice gap and 26 subjects with 10% gap. 168  
104 functional images were acquired for each subject, with four dummy scans collected before the real scans  
105 to allow for steady-state magnetization. T1-weighted structural images were collected in 176 interleaved  
106 sagittal slices with 1 mm isotropic voxels (GRAPPA parallel imaging, acceleration factor of 3; FOV:  
107 256 mm). For more information about the dataset please refers to (Richardson et al., 2018).

### 108 **2.2. FMRI data analysis**

### 109 **2.2.1. Preprocessing**

110 FMRI data processing and analyses were performed using SPM12 and MATLAB (R2017b) scripts. A  
111 subject's T1 weighted structural image was first segmented into gray matter, white matter, cerebrospinal  
112 fluid, and other tissue types, and was normalized into standard Montreal Neurological Institute (MNI)  
113 space. The T1 images were then skull stripped based on the segmentation results. Next, all the functional  
114 images of a subject were realigned to the first image of the session and coregistered to the skull stripped  
115 T1 image of the same subject. Framewise displacement was calculated for the translation and rotation  
116 directions for each subject (Di and Biswal, 2015). Subjects who had maximum framewise displacement  
117 greater than 1.5 mm or  $1.5^\circ$  were discarded from further analysis. See supplementary materials section S1  
118 for additional analysis on the head motion effects. The functional images were then normalized to MNI  
119 space using the parameters obtained from the segmentation step with resampled voxel size of  $3 \times 3 \times 3$   
120  $\text{mm}^3$ . The functional images were then spatially smoothed using a Gaussian kernel of 8 mm. Lastly, a  
121 voxel-wise general linear model (GLM) was built for each subject to model head motion effects (Friston's  
122 24-parameter model) (Friston et al., 1996), low frequency drift (1/128 Hz), and constant offset. The  
123 residuals of the GLM were saved as a 4-D image series, which were used for further intersubject  
124 correlation analysis. The residual time series were all mean centered because of the constant term  
125 included in the GLM.

126 Removing low frequency drifts in BOLD signals is a critical step for dynamic connectivity  
127 analysis (Leonardi and Van De Ville, 2015). Leonardi and Van De Ville have suggested a high-pass filter  
128 of  $1/W$  Hz to avoid spurious dynamic connectivity caused by low-frequency fluctuations, where  $W$   
129 represents the window length in the sliding window analysis. The high-pass filter of 1/128 Hz is the  
130 default in the GLM module in SPM. Given the window length of 60 s (30 TR) in the current analysis, we  
131 also applied high-pass filtering of 1/64 Hz in a supplementary analysis. The results are very similar to  
132 what using the  $1 / 128$  Hz high-pass filtering (see supplementary materials section S3).

### 133 **2.2.2. Intersubject correlation analysis**

134 The correlations of time series of either brain activity or dynamic connectivity are calculated between  
135 pairs of subjects. If there are  $N$  subjects, then there will be  $N \times (N-1) / 2$  correlation coefficients. The  
136 statistics of these correlations become tricky, because they are calculated from only  $N$  subjects, therefore  
137 not independent. An alternative approach is leave-one-out (Nastase et al., 2019), where the time series of  
138 one hold-out subject were correlated with the averaged time series of the remaining  $N - 1$  subjects. The  
139 averaged time series of  $N - 1$  subjects were thought to reflect the consistent component rather than noisy  
140 individual's time series. Therefore, the resulting correlations should be higher than the pair-wise  
141 correlations. Another benefit is that this approach estimates one correlation for each subject, making  
142 group level statistics easier. Therefore, we adopt the leave-one-out approach in the current analysis.

143 We first performed intersubject correlation analysis on regional activity time series. The  
144 preprocessed BOLD time series were extracted for each voxel and subject in a gray matter mask. For a  
145 given voxel, the time series of one subject was held out, and the averaged time series of the remaining  
146 subject were calculated. Then the time series of the hold-out subject were correlated with the averaged  
147 time series. This process was performed for every voxel and every subject, resulting in one correlation  
148 map for one subject. The correlation maps were transformed into Fisher's  $z$  maps. Group level one  
149 sample  $t$  test was then performed to identify regions whose intersubject correlations were consistently  
150 greater than 0. However, the null hypothesis statistical significance testing may not provide much  
151 information of the effect size. There may be only small but consistent correlations for each subject,  
152 which could give rise to very high statistical significance in a one sample  $t$  test. Indeed, when doing such  
153 null hypothesis statistical significance testing for intersubject correlation analysis, usually almost all the  
154 brain regions will show somehow significant correlations (Chen et al., 2016). We are more interested and  
155 focused on the real effect size, i.e. correlation coefficients, in our analysis. We therefore averaged the  
156 Fisher's  $z$  maps, and transformed them back into  $r$  maps. The continuous  $r$  maps were shown in the  
157 results section.

158 We next performed intersubject correlation analysis on dynamic connectivity using a seed-based  
159 approach. Given that a set of brain regions showed high intersubject correlations of regional activity, we



160 defined these regions as seeds. We adopted a relatively high threshold of  $r > 0.45$  for the averaged  
161 intersubject correlation map of regional activity to isolate four visual related seeds. Two of them were  
162 located in the medial and posterior portion of the occipital lobe, which mainly covered the lingual gyrus  
163 and calcarine sulcus. The other two seeds were located bilaterally in the middle occipital gyrus and  
164 extended to the middle temporal gyrus. We labeled them as left and right medial visual and lateral visual  
165 seeds, respectively. In addition, we adopted a relatively low threshold of  $r > 0.35$  to isolate the left and  
166 right supramarginal gyrus seeds. The maps of the six seeds are available at:  
167 <https://identifiers.org/neurovault.collection:6245>.

168 For each seed, we performed voxel-wise correlation analysis, i.e. calculating intersubject  
169 correlations of dynamic connectivity between the seed and every voxel in the gray matter mask. For two  
170 given time series from a seed and a voxel, we first applied sliding window technique to calculate dynamic  
171 connectivity for each subject. The window length was set as 30 time points (60 s) (Nastase et al., 2019),  
172 and the time step was set as 2 time point (4 s). Therefore, the time course of dynamic connectivity had 70  
173 window steps. Next, we calculated correlations between the time courses of dynamic connectivity of a  
174 given subject with the averaged dynamic connectivity of the remaining subjects for a given voxel. As a  
175 result, there was one correlation map for each seed and each subject.

176 The  $r$  maps of correlations of dynamic connectivity were transformed into Fisher's  $z$  maps for  
177 group level statistical analysis. Again, we simply calculated an averaged  $z$  map for a seed, and  
178 transformed it back into  $r$  map. In addition, we performed group-level analysis to identify regions that  
179 showed different dynamic connectivity patterns with different levels of seeds. Specifically, we calculated  
180 contrast images from the Fisher's  $z$  maps for each subject representing the differences between specific  
181 levels of seeds compared with the other seeds. For example, we calculated a contrast image using [1, 1, -  
182 0.5, -0.5, -0.5, -0.5] on the six  $z$  maps of a subject to define the differences between the two medial visual  
183 seeds and the remaining four seeds. The contrast images were entered into a one sample  $t$  test GLM using  
184 nonparametric statistics in SnPM13 (Statistical NonParametric Mapping, <http://warwick.ac.uk/snpm>).  
185 Resulting clusters were first formed at  $p < 0.001$ , and the cluster extend was thresholded using family-

186 wise error (FWE) corrected  $p < 0.0167$  ( $0.05 / 3$ ). The cluster level FWE threshold (0.0167) was chosen  
187 to further account for the three levels of seeds (medial visual, lateral visual, and supramarginal seeds).

188 In addition to the voxel-based analysis, we also performed region of interest (ROI)-based analysis  
189 for in-depth examinations of the dynamic connectivity effects. In addition to the six seeds, we included  
190 three more regions that showed different intersubject correlations of dynamic connectivity with different  
191 seeds. Specifically, they were the left precentral gyrus that showed higher intersubject correlations of  
192 dynamic connectivity with the medial visual seeds, and the posterior cingulate cortex and medial  
193 prefrontal cortex that showed higher intersubject correlations of dynamic connectivity with the  
194 supramarginal gyrus seeds. The regions were defined based on the statistical significant clusters from the  
195 group-level analysis. The maps of the three regions are available at:  
196 <https://identifiers.org/neurovault.collection:6245>. The calculations of intersubject correlations of dynamic  
197 connectivity were the same as the seed-based analysis.

198 The selections of sliding window length is nontrivial (Fu et al., 2014; Zhang et al., 2013). In  
199 addition to the 30-TR window length, we also explored other window length of 10 TRs (20 s), 20 TRs (40  
200 s), 40 TRs (80 s), 50 TRs (100 s), and 60 TRs (120 s). For each window length, we calculated  
201 intersubject correlations of dynamic connectivity among the 9 ROIs.

### 202 **2.2.3. Relations with other measures**

203 We first compared the intersubject consistent dynamic connectivity with stable functional connectivity.  
204 For each subject, we calculated correlation coefficients across the 9 ROIs, and transformed them into  
205 Fisher's z. Then the z matrices were averaged across the 29 subjects, and transformed back into r values.  
206 In addition, we calculated the consistent component of each ROI, i.e. averaging the time series across the  
207 29 subjects. And then one single correlation matrix among the 9 ROIs was calculated.

208 Given the consistent component of the 9 ROIs, we also calculated dynamic connectivity between  
209 pairs of ROIs using the same sliding window approach. The time courses of dynamic connectivity  
210 calculated from the consistent component were compared with the averaged dynamic connectivity that  
211 was calculated from each subject.

212 We further asked whether the observed intersubject consistent dynamic connectivity was driven  
213 by the consistent component of regional activity, or by the subject-specific idiosyncratic component. To  
214 do so, for each ROI, we regressed out the consistent component from each subject's time series, and  
215 calculated dynamic connectivity from the residual time series for each subject. Intersubject correlations  
216 of dynamic connectivity calculated from the residual time series were compared with those from the raw  
217 time series.

218 Lastly, we calculated intersubject correlations of regional activity using the same sliding window  
219 approach for the 9 ROIs. That is, for each ROI, intersubject correlation was calculated at each window,  
220 resulting in a time course of intersubject consistency of regional activity in each of the ROI.

221

## 222 **3. Results**

### 223 **3.1. Intersubject correlations of regional activity**

224 We first calculated intersubject correlations of regional activity for every voxel in the brain during the  
225 video watching (Figure 2A). The highest correlations were around 0.5. The major regions that had high  
226 intersubject correlations were the visual cortex extending anterior to the fusiform gyrus and middle  
227 temporal lobe. The bilateral supramarginal gyrus also showed high intersubject correlations. The  
228 bilateral precentral gyrus also showed intersubject correlations, but the effect sizes were much smaller.  
229 Figure 2A shows all the voxels with positive correlation values. It is noteworthy that many regions  
230 showed very small intersubject correlations, including largely the prefrontal cortex and anterior temporal  
231 lobe.

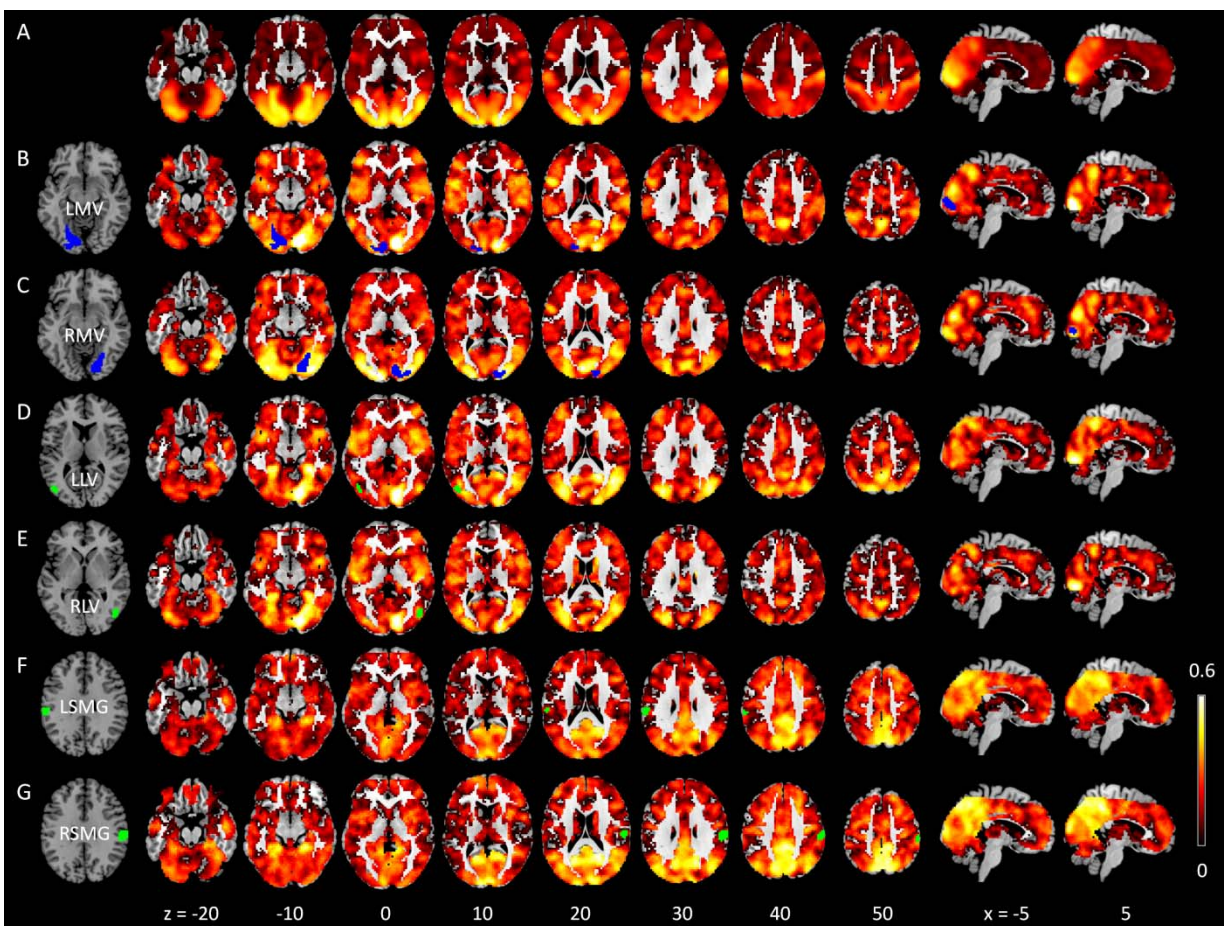

232  
233 **Figure 2** Intersubject correlation maps of regional activity (A) and dynamic connectivity with different  
234 seeds (B through G). The seed regions were depicted in blue or green in respective rows. All voxels with  
235 positive correlations are shown. The numbers at the bottom represent z or x coordinates in Montreal  
236 Neurological Institute (MNI) space. LMV, left medial visual; RMV, right medial visual; LLV, left lateral  
237 visual; RLV, right lateral visual; LSMG, left supramarginal gyrus; RSMG, right supramarginal gyrus. All  
238 the maps are available at: <https://identifiers.org/neurovault.collection:6245>.

239  
240 **3.2. Intersubject correlations of dynamic connectivity**

241 **3.2.1 Seed-based analysis**

242 We defined seed regions where there were high intersubject correlations of regional activity, which  
243 included bilateral medial visual regions, lateral visual regions, and supramarginal gyrus. We next

244 calculated voxel-wise intersubject correlations of dynamic connectivity with the six seeds, respectively  
245 (Figure 2B through 2G). There were widespread brain regions that showed intersubject consistent  
246 dynamic correlations with different seeds. First of all, the effect sizes of the intersubject correlations of  
247 dynamic connectivity, i.e. the correlation coefficients, were comparable to those in the intersubject  
248 correlations of regional activity. Secondly, regions with intersubject correlations of dynamic connectivity  
249 turned out to be more widespread and extended to the frontal and parietal regions that did not show high  
250 intersubject correlations of regional activity. See supplementary materials section S2 for direct  
251 comparisons between the intersubject correlations of dynamic connectivity and those of regional activity.  
252 Thirdly, the left and right corresponding seeds showed similar dynamic connectivity patterns, but there  
253 were substantial differences in the patterns of dynamic connectivity among medial visual, lateral visual,  
254 and supramarginal gyrus seeds. In order to highlight specific brain regions that showed dynamic  
255 connectivity with different seeds, we compared each pair of seeds with the remaining seeds using  
256 nonparametric group-level model (Figure 3 and Table 1). The medial visual seeds showed more  
257 consistent dynamic connectivity with the left precentral gyrus and occipital regions compared with other  
258 seeds. The lateral visual seeds showed more consistent dynamic connectivity with several visual regions  
259 compared with the other seeds. In contrast, the supramarginal seeds showed consistent dynamic  
260 connectivity with the precuneus/posterior cingulate gyrus and medial prefrontal cortex compared with the  
261 other seeds, which basically formed the default mode network.

262

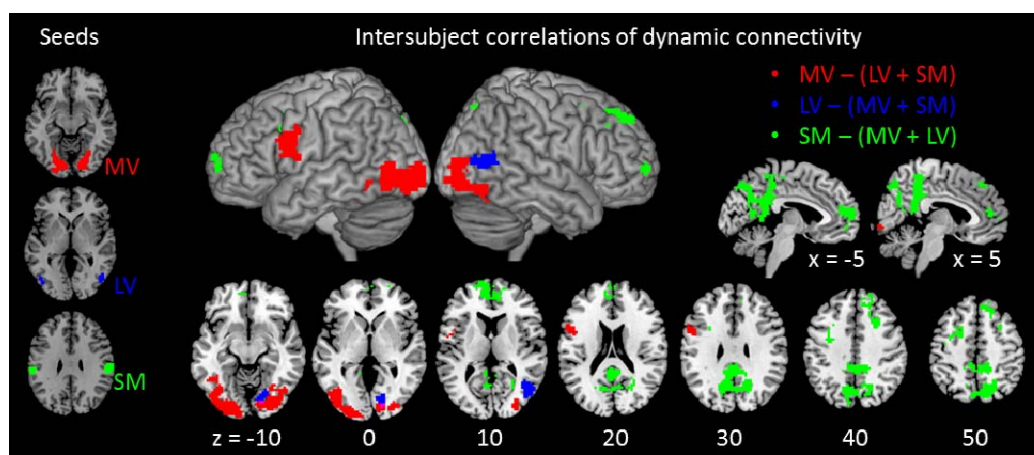



263 **Figure 3** Differential intersubject correlations of dynamic connectivity among the medial visual, lateral  
 264 visual, and supramarginal gyrus seeds (depicted on the left). All maps were thresholded at  $p < 0.001$ , and  
 265 cluster thresholded at  $p < 0.0167$  ( $0.05 / 3$ ) after family-wise error (FWE) correction using nonparametric  
 266 method. MV, medial visual; LV, lateral visual; and SM, supramarginal gyrus. Unthresholded statistical  
 267 maps are available at: <https://identifiers.org/neurovault.collection:6245>.

### 269 3.2.2. Relations with stable functional connectivity

270 In order to better understand and interpret the dynamic connectivity and regional functions, we further  
 271 calculated different types of connectivity measures among a set of regions of interest. In addition to the  
 272 six seeds, we defined left precentral gyrus, posterior cingulate cortex, and medial prefrontal cortex ROIs  
 273 that showed different dynamic connectivity with different seeds. Among the 9 regions, we calculated  
 274 regular mean functional connectivity (Figure 4A) and connectivity derived from the consistent  
 275 components across the 29 subjects (Figure 4B). These two correlation matrices looked similar, and  
 276 clearly showed three clusters of brain regions. The first four regions were all visual. The fifth to seventh  
 277 regions were the bilateral supramarginal gyrus, and lateralized frontal region, which were all high order  
 278 association brain regions. And the last two regions were part of the default mode network, which showed  
 279 negative correlations with the association regions in the consistent component correlations.

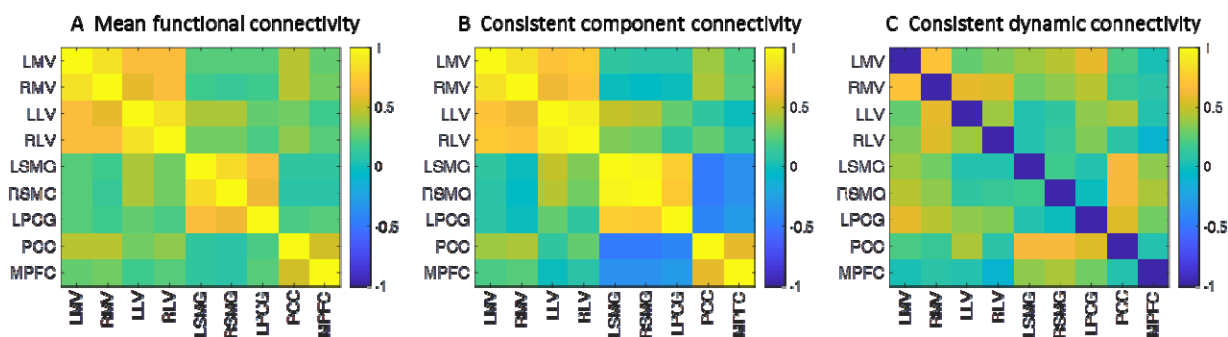

280  
 281 **Figure 4** Correlation matrices among the 9 regions of interest (ROI) using different methods. A) Mean  
 282 functional connectivity across the 29 subjects. B) Correlations of the consistent component of each ROI  
 283 (averaged time series across the 29 subjects). C) Intersubject correlations of dynamic connectivity. LMV,

284 left medial visual; RMV, right medial visual; LLV, left lateral visual; RLV, right lateral visual; LSMG,  
285 left supramarginal gyrus; RSMG, right supramarginal gyrus; LPCG, left precentral gyrus; PCC, posterior  
286 cingulate cortex; and MPFC, medial prefrontal cortex.

287  
288 The intersubject consistent dynamic connectivity matrix (Figure 4C) was largely different from  
289 the two stable correlation matrices. Some high consistent dynamic connectivity was observed within the  
290 visual regions. The highest correlation was between the left and right medial visual regions ( $r = 0.70$ ). In  
291 contrast, many consistent dynamic connectivity were shown between different functional networks, where  
292 there were virtually none or even negative stable correlations. Specifically, the medial visual regions  
293 showed high consistent dynamic connectivity with the left precentral gyrus ROI. The highest intersubject  
294 correlation was 0.56 between left medial visual region and left precentral gyrus. The default mode  
295 regions and supramarginal regions also showed high consistent dynamic connectivity. The highest  
296 correlation was 0.64 between the posterior cingulate cortex and right supramarginal gyrus. It is  
297 noteworthy that these regions generally showed negative stable correlations in Figure 4B.

298 Lastly, we analyzed the time courses of dynamic connectivity for the above mentioned pairs of  
299 regions (Figure 5). The dynamic connectivity between left and right medial visual regions was in general  
300 high, which is consistent with the results of stable connectivity. But it can be seen that the connectivity  
301 level went down during the first half of windows, and continued with two cycles of up and down  
302 fluctuations. The fluctuations rather than a monotonic linear trend suggest that the dynamics of  
303 connectivity is not simply due to sensory habituations. The left medial visual region and left precentral  
304 gyrus did not show high level of correlations in general. But it had small positive correlations at the  
305 beginning of the run, went down to around zero, and then went back to small positive correlations. What  
306 is more interesting is the dynamic connectivity between the right supramarginal gyrus and posterior  
307 cingulate cortex, where the connectivity switched between positive and negative values during the whole  
308 course.

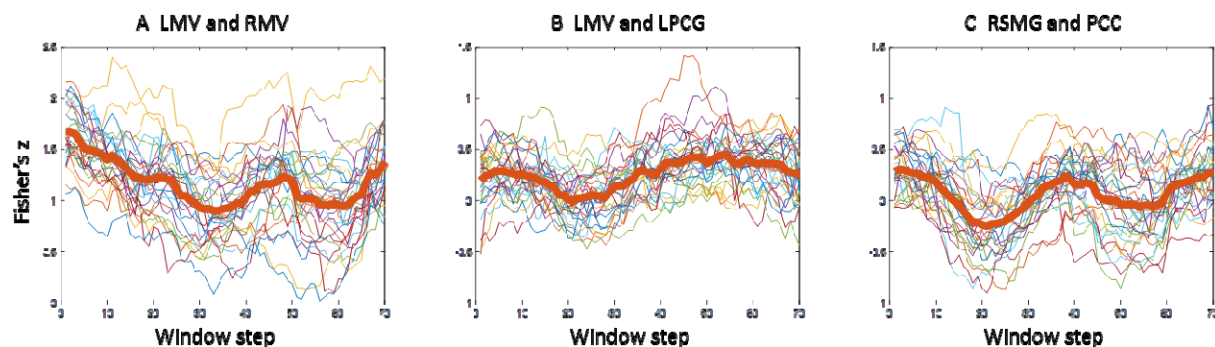

309  
310 **Figure 5** Time courses of dynamic connectivity (Fisher's  $z$ ) for three pairs of regions of interest. Each  
311 thinner line represents the time course of one subject, and the thicker red lines represent the averaged time  
312 courses. LMV, left medial visual; RMV, right medial visual; LPCG, left precentral gyrus; RSMG, right  
313 supramarginal gyrus; PCC, posterior cingulate cortex.

314

### 315 3.2.3. Relations with the consistent component

316 A subsequent question is that whether the observed intersubject consistent dynamic connectivity is driven  
317 by the consistent component of regional activity across subject, or by subject-specific idiosyncratic  
318 components. We then regressed out the consistent component for each subject's time series and  
319 calculated intersubject correlations of dynamic connectivity from the residual time series (Figure 6B).  
320 Compared with the intersubject correlations of dynamic connectivity from the original analysis (Figure  
321 6A), the consistency of dynamic connectivity from the residual time series were largely diminished.  
322 Figure 6D and 6E illustrate the changes of dynamic connectivity time courses after the regression  
323 between a representative ROI pair, i.e. right supramarginal gyrus and posterior cingulate cortex (see  
324 supplementary Figure S4 for other ROI pairs). The intersubject correlation reduced from 0.64 to 0.29.  
325 Figure 6C illustrates the dynamic connectivity of the consistent components of regional activity between  
326 these two ROIs. The fluctuating pattern was similar to those calculated from individual subject's original  
327 time series (Figure 6D), further confirmed that the consistent dynamic connectivity across individuals was  
328 driven by the consistent component of regional activity.



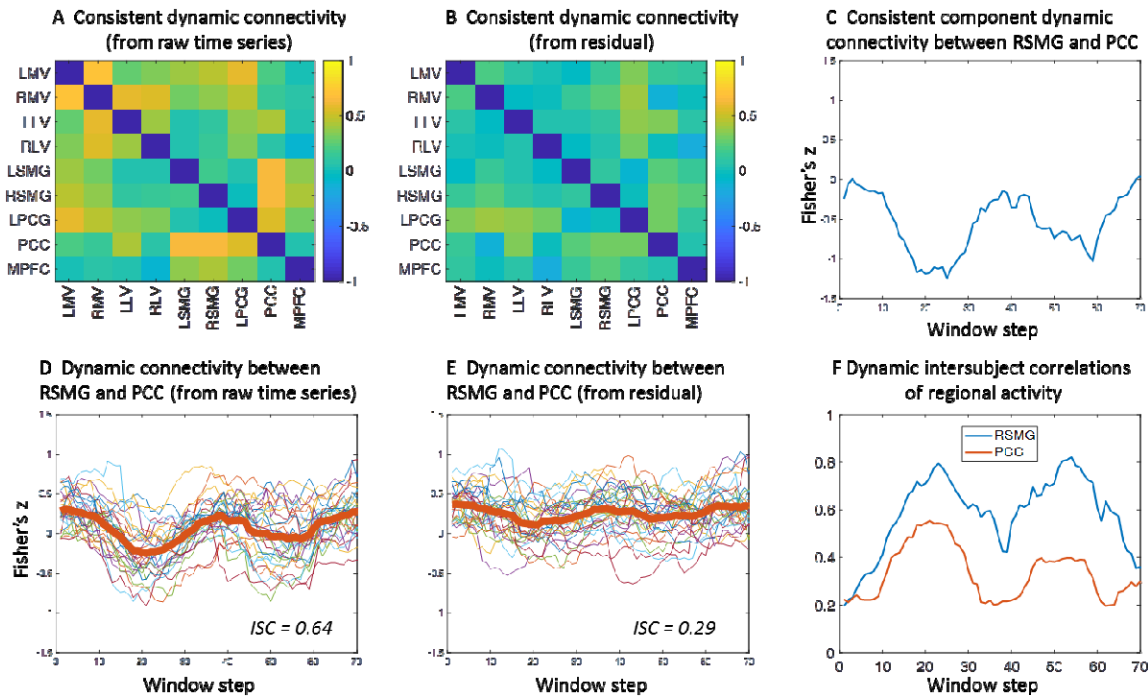

329

330 **Figure 6** A) and B) Intersubject correlations (ISC) of dynamic connectivity calculated from raw time  
 331 series (A) and residual time series after regressing out the intersubject consistent components (B). C)  
 332 Dynamic connectivity of the consistent component of regional activity between right supramarginal gyrus  
 333 (RSMG) and posterior cingulate cortex (PCC). D) and E) Time courses of dynamic connectivity (Fisher's  
 334 z) between RSMG and PCC calculated from raw time series (D) and the residual time series after  
 335 regressing out the intersubject consistent component. F) The time courses of intersubject correlations of  
 336 regional activity in RSMG and PCC.

337

338 Lastly, we calculated intersubject correlations of regional activity in every sliding window  
 339 (supplementary Figure S5). Figure 6F shows the time courses of intersubject correlations of regional  
 340 activity in the right supramaginal gyrus and posterior cingulate cortex ROIs. Both regions showed  
 341 similarly but reversed time courses as the dynamic connectivity between them. That is, during the two  
 342 periods of dips of dynamic connectivity, there were elevated intersubject correlations of regional activity  
 343 in both regions. But this kind of close relations cannot be observed in the other two pairs of ROIs  
 344 (supplementary Figure S4).

#### 345 **3.2.4. Effects of sliding-window length**

346 We repeated the ROI-based intersubject correlation analysis of dynamic connectivity using different  
347 window length from 10 TRs to 60 TRs. The intersubject correlation matrices were in general weaker  
348 when the window was shorter, especially for the 10-TR window (Figure 7). As the window went longer,  
349 the correlations matrices became similar to the 30-TR window results. But for even longer window, there  
350 were two different trends. First, some of the intersubject correlations kept increasing, usually between  
351 regions that involved in one or two visual ROIs (Figure 7B). On the other hand, some of the intersubject  
352 correlations decreased after peaked at the 30-TR window, usually between regions that involved  
353 supramarginal gyrus or posterior cingulate cortex. Figure 7C illustrated the time courses of dynamic  
354 connectivity between right supramarginal gyrus and posterior cingulate cortex. It can be seen that the  
355 variability of dynamic connectivity time courses were larger in short window. When using 10-TR  
356 window, the dynamic connectivity changed fast, and were not aligned across subjects. When using 30-  
357 TR window, the dynamic connectivity time courses became smoother, and the fluctuations were more  
358 aligned across subjects, which in turn gave rise to higher intersubject correlations. But when using 50-TR  
359 window, the time courses of dynamic connectivity become too smooth, so that the subject averaged trend  
360 become less apparent. It's noteworthy that for the dynamic connectivity between the left and right medial  
361 visual ROIs and between left medial visual and left precentral gyrus ROIs, there were linear trends of  
362 dynamic connectivity across subjects, which gave rise to high intersubject correlations in longer windows  
363 (Figure S6).

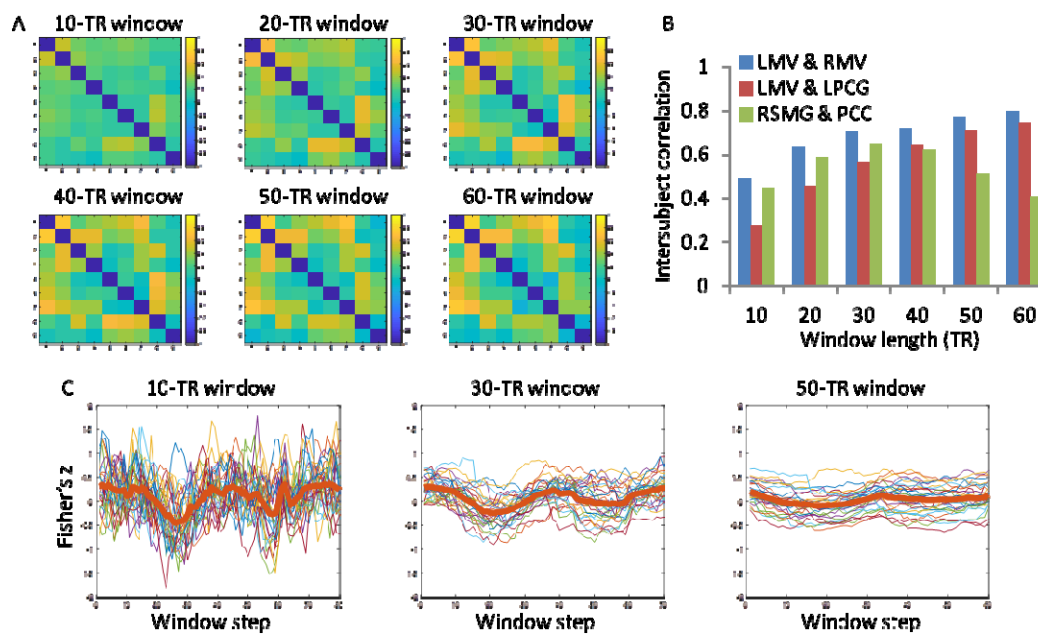

364  
365 **Figure 7** A) The effects of sliding-window length on the intersubject correlations of dynamic connectivity.  
366 B) Intersubject correlations of dynamic connectivity of three pairs of regions of interest: left medial visual  
367 (LMV) and right medial visual (RMV), LMV and left precentral gyrus (LPCG), and right supramarginal  
368 gyrus (RSMG) and posterior cingulate cortex (PCC). C) The time courses of dynamic connectivity  
369 between RSMG and PCC in three window lengths. TR, repetition time.

370  
371

#### 372 4. Discussion

373 In the current study, we proposed intersubject correlation analysis on the time courses of dynamic  
374 connectivity during natural vision. We were able to identify intersubject consistent dynamic connectivity  
375 at similar levels as the intersubject correlations of regional activity, although the time courses of dynamic  
376 connectivity were thought to be noisier than the original time series. By using seed regions from the  
377 visual cortex and supramarginal gyrus, we demonstrated widespread brain regions that showed high  
378 intersubject consistent dynamic connectivity with these seeds, although these regions themselves did not  
379 show intersubject correlations of regional activity. These regions included high order association regions  
380 such as frontal and parietal regions, as well as the default mode network. The intersubject consistent

381 patterns of dynamic connectivity support the functional meaningfulness of dynamic connectivity during  
382 movie watching, and suggest that dynamic connectivity could be a complementary avenue to characterize  
383 the functions of a brain region.

384         The brain regions that had the highest intersubject correlations of regional activity are mainly in  
385 the posterior visual related regions, which are consistent with previous studies (Hasson et al., 2004;  
386 Nummenmaa et al., 2012). In addition, the current study found dynamic connectivity among different  
387 levels of visual areas that were highly consistent across subjects. This is interesting because although the  
388 overall functional connectivity among the visual areas are very high (Figure 4A), there are still  
389 functionally meaningful fluctuations of interactions among the visual regions. The observable dynamics  
390 of connectivity among visual areas are in line with previous studies showing task modulated connectivity  
391 among visual areas in different task conditions (Di et al., 2019, 2015; Di and Biswal, 2017). It is  
392 interesting to note that the dynamics of intersubject correlations of regional activity in the visual areas  
393 also showed decreased trends at the beginning of the session (Figure S4 and S5). Therefore, the  
394 decreased connectivity in the beginning may reflect adaptations effects in the visual areas. However,  
395 during the latter half of the session, the dynamics of intersubject correlations of regional activity kept at a  
396 stable level, which cannot explain the dynamics of connectivity between them (Figure S4).

397         The bilateral supramarginal gyrus regions are major regions outside the visual cortex that showed  
398 high intersubject correlations of regional activity. The involvements of supramarginal gyrus of  
399 intersubject correlations are inconsistent in the literature (Hasson et al., 2004; Kauppi et al., 2010), which  
400 probably due to different movies the participants watched. Given their critical role in empathy (Silani et  
401 al., 2013), it is reasonable to observe high intersubject correlations in the supramarginal gyrus during the  
402 watching of the animated movie, which involves the understanding the intentions of different animated  
403 characters. Interestingly, the intersubject correlations of regional activity in the supramarginal gyrus also  
404 showed dynamics, with two periods of high correlations roughly between the 20<sup>th</sup> and 30<sup>th</sup> windows and  
405 between the 50<sup>th</sup> and 60<sup>th</sup> windows (Figure 6F and S4B). The first may correspond to the scene when  
406 Peck the stork and Gus the cloud first met, where their interactions appeared to be different from the other

407 storks and clouds. The second may coincide with the scene when Peck flew away, and Gus thought Peck  
408 had abandoned him. These scenes require active inferences of the intentions of the characters, and may  
409 involve mismatches between predictions and the actual story development. Therefore, it is reasonable to  
410 see high cross-subject similarities in the supramarginal gyrus during these two periods.

411 In addition to regional activity, we also found that the default mode network showed highly  
412 consistent dynamic connectivity with the supramarginal gyrus regions. Similar to the supramarginal  
413 gyrus ROIs, the regional activity in the posterior cingulate cortex showed two periods of high consistent  
414 regional activity (Figure 6F). But interestingly, during these two periods the posterior cingulate cortex  
415 and supramarginal gyrus showed strong anti-correlation (Figure 6C). The default mode network involves  
416 high-order representation of the world (Carhart-Harris and Friston, 2010). And the functional  
417 communications between the default mode network and supramarginal gyrus may reflect the prediction  
418 error between inner representation and the input from the video. Similar to a previous study using  
419 dynamic intersubject connectivity analysis (Simony et al., 2016), both of the studies highlighted the  
420 critical role of the default mode network in understanding of the narratives of a movie.

421 Generally speaking, the intersubject consistent connectivity and stable functional connectivity  
422 showed disassociations. Specifically, the ROI pairs that showed highly consistent dynamic connectivity  
423 may have high stable functional connectivity or very low overall connectivity. The latter case may be  
424 more interesting, because it suggests transient functional communications that cannot be observed in  
425 traditional functional connectivity analysis. The 9 ROIs used in the current analysis are from three  
426 functional modules, i.g. unimodal visual, higher order task positive, and default mode networks. The  
427 three functional modules can be confirmed in the matrix of stable connectivity (Figure 4A), where there  
428 are high within-module functional connectivity but weak between-module connectivity. The matrix of  
429 consistent dynamic connectivity, on the other hand, showed that there are more between-module dynamic  
430 connectivity. These results are in line with the economy account of brain network organizations, which  
431 suggests that the functional communications between modules are costly in terms of energy  
432 consumption, therefore are more transient (Bullmore and Sporns, 2012). It is also consistent with the

433 findings that the connectivity between modules are more variable and context dependent (Di and Biswal,  
434 2019; Fu et al., 2017).

435 By calculating dynamic connectivity time courses from individual's time series, the proposed  
436 method focused on the consistency of the dynamic connectivity time courses across subjects. Our  
437 additional analysis showed that the consistent dynamic connectivity time courses was driven by the  
438 dynamic connectivity of the consistent component of the regional time series, at least for the current video  
439 watched. The latter method provides a simple approach to reveal the dynamics of connectivity, and is  
440 closely related to the dynamic intersubject functional connectivity approach proposed by Simony et al.  
441 (Simony et al., 2016). Our method, on the other hand, can not only reveal the time course of dynamic  
442 connectivity, but can also provide a quantity of a connection about how the dynamic connectivity is  
443 consistent across subjects. Eventually, we will be able to obtain a matrix of the consistency of dynamic  
444 connectivity among ROIs from the whole brain. This is important because the seed-based approach used  
445 in the current analysis may miss dynamic connectivity between regions that do not have consistent  
446 regional activity. The connectome-based approach can provide a comprehensive mapping of dynamic  
447 communications across the brain during the watching of a movie, and can be seen a special form of task  
448 connectome (Di and Biswal, 2019).

449 The selection of window length for dynamic connectivity analysis is nontrivial (Fu et al., 2014;  
450 Zhang et al., 2013). The shorter the window length, the finer the temporal resolution for dynamic  
451 connectivity could be. However, less time points for each window would also mean noisier estimates of  
452 connectivity. In the current analysis, 10-TR window gave very noisy estimate of functional connectivity,  
453 thus making intersubject correlations very low. On the other hand, longer window will make connectivity  
454 estimate accurate, but at a cost of losing temporal resolution. In the context of the current video watched,  
455 30-TR window seems a balance. However, this time scale of dynamic connectivity fluctuations may not  
456 be easily generalized to other videos or to resting-state. But it certainly can provide some insight to the  
457 chosen of window length in future studies. In addition, some computational method may be used to avoid  
458 the window length issue, e.g. using adaptive covariance estimates (Fu et al., 2014; Zhang et al., 2013) or

459 window-free method such as Kalman filtering (Kang et al., 2011) or instantaneous phase synchronization  
460 (Glerean et al., 2012).

461

## 462 **5. Conclusion**

463 In the current study, we proposed intersubject correlation analysis on dynamic connectivity. The results  
464 revealed widespread brain regions that showed consistent intersubject correlations of dynamic  
465 connectivity. The consistent correlations support the functional significance of dynamic connectivity  
466 during natural vision. The method may provide a complementary approach to understand the dynamic  
467 nature of brain functional integrations.

468

469

## 470 **Acknowledgement:**

471 This study was supported by grants from (US) National Institute of Health (R01 AT009829; R01  
472 DA038895).

473

## 474 **Conflict of interest**

475 The authors declared that there is no conflict of interest.

476

477

## 478 **References:**

- 479 Allen, E.A., Damaraju, E., Plis, S.M., Erhardt, E.B., Eichele, T., Calhoun, V.D., 2014. Tracking whole-  
480 brain connectivity dynamics in the resting state. *Cereb. Cortex N. Y. N 1991* 24, 663–76.  
481 <https://doi.org/10.1093/cercor/bhs352>
- 482 Bullmore, E., Sporns, O., 2012. The economy of brain network organization. *Nat. Rev. Neurosci.* 13,  
483 336–349. <https://doi.org/10.1038/nrn3214>
- 484 Carhart-Harris, R.L., Friston, K.J., 2010. The default-mode, ego-functions and free-energy: a  
485 neurobiological account of Freudian ideas. *Brain J. Neurol.* 133, 1265–83.  
486 <https://doi.org/10.1093/brain/awq010>
- 487 Chen, G., Shin, Y.-W., Taylor, P.A., Glen, D.R., Reynolds, R.C., Israel, R.B., Cox, R.W., 2016.  
488 Untangling the relatedness among correlations, part I: Nonparametric approaches to inter-subject



- 489 correlation analysis at the group level. *NeuroImage* 142, 248–259.  
490 <https://doi.org/10.1016/j.neuroimage.2016.05.023>
- 491 Di, X., Biswal, B.B., 2019. Toward Task Connectomics: Examining Whole-Brain Task Modulated  
492 Connectivity in Different Task Domains. *Cereb. Cortex* 29, 1572–1583.  
493 <https://doi.org/10.1093/cercor/bhy055>
- 494 Di, X., Biswal, B.B., 2017. Psychophysiological Interactions in a Visual Checkerboard Task:  
495 Reproducibility, Reliability, and the Effects of Deconvolution. *Front Neurosci* 1–36.  
496 <https://doi.org/10.3389/fnins.2017.00573>
- 497 Di, X., Biswal, B.B., 2015. Characterizations of resting-state modulatory interactions in the human brain.  
498 *J. Neurophysiol.* 114, 2785–96. <https://doi.org/10.1152/jn.00893.2014>
- 499 Di, X., Fu, Z., Chan, S.C., Hung, Y.S., Biswal, B.B., Zhang, Z., 2015. Task-related functional  
500 connectivity dynamics in a block-designed visual experiment. *Front. Hum. Neurosci.* 9, 1–11.  
501 <https://doi.org/10.3389/fnhum.2015.00543>
- 502 Di, X., Zhang, Z., Biswal, B.B., 2019. Understanding psychophysiological interaction and its relations to  
503 beta series correlation. *bioRxiv* 322073. <https://doi.org/10.1101/322073>
- 504 Fox, M.D., Snyder, A.Z., Vincent, J.L., Corbetta, M., Van Essen, D.C., Raichle, M.E., 2005. The human  
505 brain is intrinsically organized into dynamic, anticorrelated functional networks. *Proc. Natl. Acad. Sci. U. S. A.* 102, 9673–8.  
506
- 507 Friston, K.J., 2011. Functional and effective connectivity: a review. *Brain Connect.* 1, 13–36.  
508 <https://doi.org/10.1089/brain.2011.0008>
- 509 Friston, K.J., Williams, S., Howard, R., Frackowiak, R.S., Turner, R., 1996. Movement-related effects in  
510 fMRI time-series. *Magn. Reson. Med. Off. J. Soc. Magn. Reson. Med. Soc. Magn. Reson. Med.*  
511 35, 346–55. [https://doi.org/DOI 10.1002/mrm.1910350312](https://doi.org/DOI%2010.1002/mrm.1910350312)
- 512 Fu, Z., Chan, S.-C., Di, X., Biswal, B., Zhang, Z., 2014. Adaptive covariance estimation of non-stationary  
513 processes and its application to infer dynamic connectivity from fMRI. *IEEE Trans. Biomed.*  
514 *Circuits Syst.* 8, 228–39. <https://doi.org/10.1109/TBCAS.2014.2306732>
- 515 Fu, Z., Tu, Y., Di, X., Biswal, B.B., Calhoun, V.D., Zhang, Z., 2017. Associations between Functional  
516 Connectivity Dynamics and BOLD Dynamics Are Heterogeneous Across Brain Networks. *Front.*  
517 *Hum. Neurosci.* 11. <https://doi.org/10.3389/fnhum.2017.00593>
- 518 Fu, Z., Tu, Y., Di, X., Du, Y., Pearlson, G.D., Turner, J.A., Biswal, B.B., Zhang, Z., Calhoun, V.D., 2018.  
519 Characterizing dynamic amplitude of low-frequency fluctuation and its relationship with dynamic  
520 functional connectivity: An application to schizophrenia. *NeuroImage* 180, 619–631.  
521 <https://doi.org/10.1016/j.neuroimage.2017.09.035>
- 522 Fu, Z., Tu, Y., Di, X., Du, Y., Sui, J., Biswal, B.B., Zhang, Z., de Lacy, N., Calhoun, V.D., 2019.  
523 Transient increased thalamic-sensory connectivity and decreased whole-brain dynamism in  
524 autism. *NeuroImage* 190, 191–204. <https://doi.org/10.1016/j.neuroimage.2018.06.003>
- 525 Glerean, E., Salmi, J., Lahnakoski, J.M., Jääskeläinen, I.P., Sams, M., 2012. Functional Magnetic  
526 Resonance Imaging Phase Synchronization as a Measure of Dynamic Functional Connectivity.  
527 *Brain Connect.* 2, 91–101. <https://doi.org/10.1089/brain.2011.0068>
- 528 Hasson, U., Nir, Y., Levy, I., Fuhrmann, G., Malach, R., 2004. Intersubject synchronization of cortical  
529 activity during natural vision. *Science* 303, 1634–40. <https://doi.org/10.1126/science.1089506>
- 530 Hutchison, R.M., Womelsdorf, T., Allen, E. a., Bandettini, P. a., Calhoun, V.D., Corbetta, M., Della  
531 Penna, S., Duyn, J.H., Glover, G.H., Gonzalez-Castillo, J., Handwerker, D. a., Keilholz, S.,  
532 Kiviniemi, V., Leopold, D. a., de Pasquale, F., Sporns, O., Walter, M., Chang, C., 2013. Dynamic  
533 functional connectivity: Promise, issues, and interpretations. *NeuroImage* 80, 360–378.  
534 <https://doi.org/10.1016/j.neuroimage.2013.05.079>
- 535 Kang, J., Wang, L., Yan, C., Wang, J., Liang, X., He, Y., 2011. Characterizing dynamic functional  
536 connectivity in the resting brain using variable parameter regression and Kalman filtering  
537 approaches. *NeuroImage* 56, 1222–34. <https://doi.org/10.1016/j.neuroimage.2011.03.033>



- 538 Kauppi, J.-P., Jääskeläinen, I.P., Sams, M., Tohka, J., 2010. Inter-subject correlation of brain  
539 hemodynamic responses during watching a movie: localization in space and frequency. *Front.*  
540 *Neuroinformatics* 4. <https://doi.org/10.3389/fninf.2010.00005>
- 541 Leonardi, N., Van De Ville, D., 2015. On spurious and real fluctuations of dynamic functional  
542 connectivity during rest. *NeuroImage* 104, 430–436.  
543 <https://doi.org/10.1016/j.neuroimage.2014.09.007>
- 544 Lindquist, M.A., Xu, Y., Nebel, M.B., Caffo, B.S., 2014. Evaluating dynamic bivariate correlations in  
545 resting-state fMRI: A comparison study and a new approach. *NeuroImage* 101, 531–546.  
546 <https://doi.org/10.1016/j.neuroimage.2014.06.052>
- 547 Nastase, S.A., Gazzola, V., Hasson, U., Keysers, C., 2019. Measuring shared responses across subjects  
548 using intersubject correlation. *Soc. Cogn. Affect. Neurosci.* 14, 667–685.  
549 <https://doi.org/10.1093/scan/nsz037>
- 550 Nummenmaa, L., Glerean, E., Viinikainen, M., Jääskeläinen, I.P., Hari, R., Sams, M., 2012. Emotions  
551 promote social interaction by synchronizing brain activity across individuals. *Proc. Natl. Acad.*  
552 *Sci. U. S. A.* 109, 9599–9604. <https://doi.org/10.1073/pnas.1206095109>
- 553 Park, H.-J., Friston, K., 2013. Structural and Functional Brain Networks: From Connections to Cognition.  
554 *Science* 342, 1238411–1238411. <https://doi.org/10.1126/science.1238411>
- 555 Power, J.D., Barnes, K.A., Snyder, A.Z., Schlaggar, B.L., Petersen, S.E., 2012. Spurious but systematic  
556 correlations in functional connectivity MRI networks arise from subject motion. *NeuroImage* 59,  
557 2142–2154. <https://doi.org/10.1016/j.neuroimage.2011.10.018>
- 558 Raichle, M.E., MacLeod, A.M., Snyder, A.Z., Powers, W.J., Gusnard, D.A., Shulman, G.L., 2001. A  
559 default mode of brain function. *Proc. Natl. Acad. Sci. U. S. A.* 98, 676–82.  
560 <https://doi.org/10.1073/pnas.98.2.676>
- 561 Richardson, H., Lisandrelli, G., Riobueno-Naylor, A., Saxe, R., 2018. Development of the social brain  
562 from age three to twelve years. *Nat. Commun.* 9, 1–12. [https://doi.org/10.1038/s41467-018-](https://doi.org/10.1038/s41467-018-03399-2)  
563 [03399-2](https://doi.org/10.1038/s41467-018-03399-2)
- 564 Rosenthal, G., Sporns, O., Avidan, G., 2017. Stimulus Dependent Dynamic Reorganization of the Human  
565 Face Processing Network. *Cereb. Cortex* 27, 4823–4834. <https://doi.org/10.1093/cercor/bhw279>
- 566 Silani, G., Lamm, C., Ruff, C.C., Singer, T., 2013. Right Supramarginal Gyrus Is Crucial to Overcome  
567 Emotional Egocentricity Bias in Social Judgments. *J. Neurosci.* 33, 15466–15476.  
568 <https://doi.org/10.1523/JNEUROSCI.1488-13.2013>
- 569 Simony, E., Honey, C.J., Chen, J., Lositsky, O., Yeshurun, Y., Wiesel, A., Hasson, U., 2016. Dynamic  
570 reconfiguration of the default mode network during narrative comprehension. *Nat. Commun.* 7,  
571 12141. <https://doi.org/10.1038/ncomms12141>
- 572 Teichert, T., Grinband, J., Hirsch, J., Ferrera, V.P., 2010. Effects of heartbeat and respiration on macaque  
573 fMRI: Implications for functional connectivity. *Neuropsychologia* 48, 1886–1894.  
574 <https://doi.org/10.1016/j.neuropsychologia.2009.11.026>
- 575 Zhang, Z.G., Fu, Z.N., Chan, S.C., Hung, Y.S., Motta, G., Di, X., Biswal, B.B., 2013. Adaptive window  
576 selection in estimating dynamic functional connectivity of resting-state fMRI, in: 2013 9th  
577 International Conference on Information, Communications & Signal Processing. IEEE, pp. 1–4.  
578 <https://doi.org/10.1109/ICICS.2013.6782935>
- 579

580

581 **Table 1** Clusters with differential intersubject correlations of dynamic connectivity among the medial  
 582 visual, lateral visual, and supramarginal gyrus seeds. All clusters were thresholded at  $p < 0.001$ , and  
 583 cluster thresholded at  $p < 0.0167$  ( $0.05 / 3$ ) after family-wise error (FWE) correction using nonparametric  
 584 method.

| cluster FWE                                                | Voxel | MNI Coordinates |      |    | Peak t | Label                          |
|------------------------------------------------------------|-------|-----------------|------|----|--------|--------------------------------|
|                                                            |       | x               | y    | z  |        |                                |
| <b>Medial visual &gt; (lateral visual + supramarginal)</b> |       |                 |      |    |        |                                |
| < 0.001                                                    | 514   | -12             | -100 | -4 | 7.85   | Occipital pole                 |
| < 0.001                                                    | 372   | 24              | -88  | -4 | 6.80   | Right inferior occipital gyrus |
| 0.001                                                      | 106   | -51             | 11   | 23 | 5.87   | Left precentral gyrus          |
| <b>Lateral visual &gt; (Medial visual + supramarginal)</b> |       |                 |      |    |        |                                |
| 0.016                                                      | 78    | 48              | -70  | 8  | 7.03   | Right inferior occipital gyrus |
| 0.013                                                      | 86    | 15              | -79  | -4 | 5.64   | Lingual gyrus                  |
| <b>Supramarginal &gt; (medial visual + lateral visual)</b> |       |                 |      |    |        |                                |
| < 0.001                                                    | 1168  | 3               | -40  | 44 | 9.12   | Precuneus                      |
| 0.002                                                      | 237   | -12             | 50   | 14 | 7.41   | Medial superior frontal gyrus  |
| 0.006                                                      | 122   | -30             | -4   | 44 | 6.90   | Left middle frontal gyrus      |
| 0.003                                                      | 175   | 18              | 50   | 44 | 6.44   | Right middle frontal gyrus     |

585

586 MNI, Montreal Neurological Institute

587
